# Supplementary material for: Comparative phosphoproteomics reveals evolutionary and functional conservation of phosphorylation across eukaryotes
Source: PubMed Central journal article supplement (PMC2760871; doi:10.1186/gb-2008-9-10-r144), 2008-10-01
Supplement: gb-2008-9-10-r144-S1.pdf [file gb-2008-9-10-r144-S1.pdf]

### Supplementary file 1: calculating the expected number of sites with homologs in a specific number of other datasets

The probability that a phosphorylation event in a query dataset is conserved in a target dataset is given by equation 1.

$$(1) P(q \in O_{Q,T}) = N_{Q,T} / N_Q$$

Where Q is the query dataset, q is a phosphorylation event in Q, T is the target dataset,  $\in$  means “element of”,  $\notin$  means “not an element of”,  $O_{Q,T}$  is overlap of Q and T (i.e. events from Q with a homologous event in T),  $N_{Q,T}$  is the number of events in  $O_{Q,T}$ , and  $N_Q$  is the total number of events in Q.

The probability that q has homologs in x of the target datasets is the sum of all possible combinations of presence and absence in all of the target datasets, given x. As an example we consider target datasets A, B and C. The probability P that q has homologs in two out of these three datasets is given by equation 2.

$$(2) P(q \mid x=2) = P(q \in O_{Q,A} \cap q \in O_{Q,B} \cap q \notin O_{Q,C}) + P(q \in O_{Q,A} \cap q \notin O_{Q,B} \cap q \in O_{Q,C}) + P(q \notin O_{Q,A} \cap q \in O_{Q,B} \cap q \in O_{Q,C})$$

Where  $P(q \mid x=2)$  is the probability that q has homologs in two target datasets, and  $\cap$  is the ‘and’ operator.

The expected number of phosphorylation events from a query dataset with homologs in x target datasets is now given by equation 3.

$$(3) E(x=i) = P(q \mid x=i) \cdot N_Q$$

In which E is the expected value, and i is a number lower than the total number of datasets.
